# Supplementary material for: Historical, Observed, and Modeled Wildfire Severity in Montane Forests of the Colorado Front Range
Source: PubMed Central journal article supplement (PMC4175072; doi:10.1371/journal.pone.0106971), 2014-09-24
Supplement: pone.0106971.s002.pdf [file pone.0106971.s002.pdf]

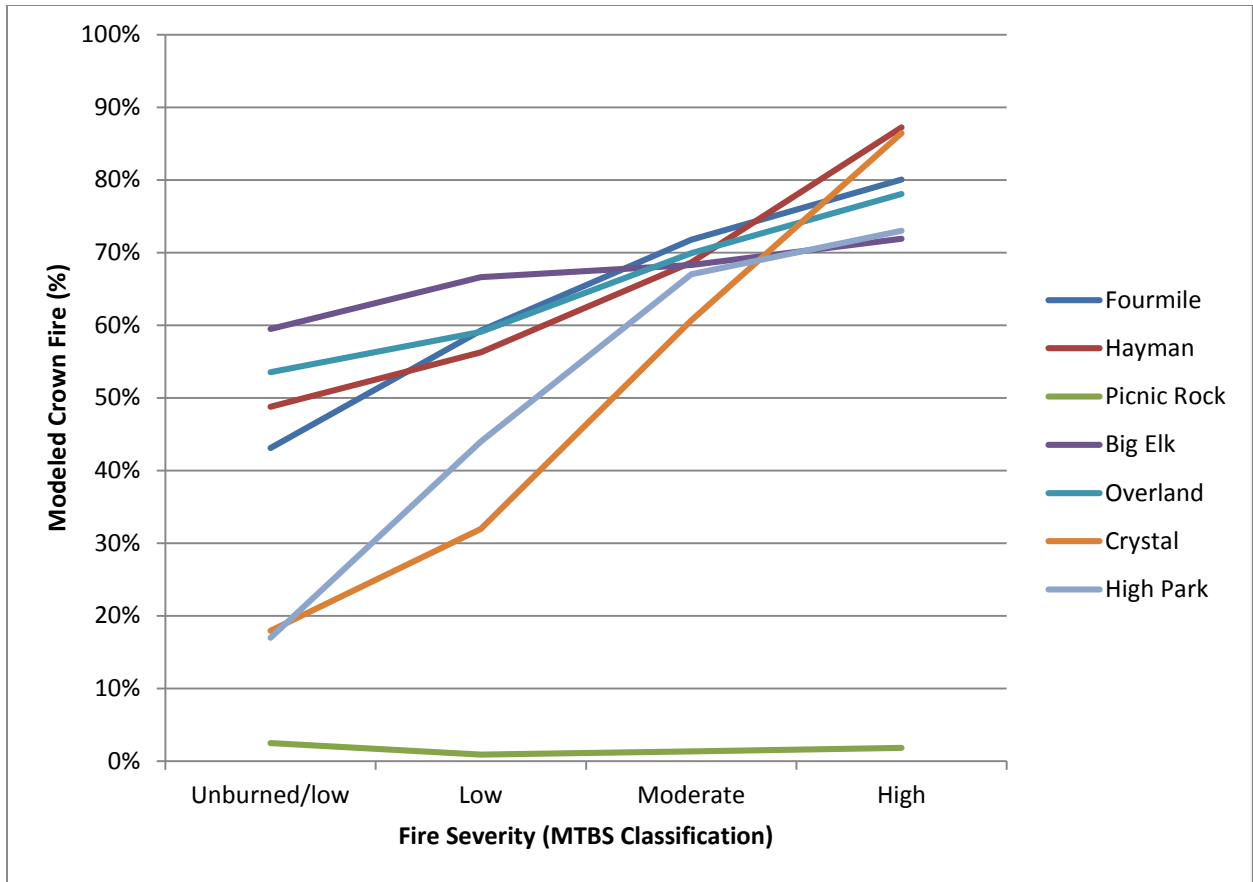

**Figure S2. MTBS fire severity class (observed) and percentage of crown fire (modeled).**

The comparison was used as a measure of verification of the modeled fire behavior.
