# Supplementary material for: Historical, Observed, and Modeled Wildfire Severity in Montane Forests of the Colorado Front Range
Source: PLoS One. 2014 Sep 24;9(9):e106971. doi: 10.1371/journal.pone.0106971 (PMC4175072; doi:10.1371/journal.pone.0106971)
Supplement: Table S2 — List of plot-level sites. The fire severity classification for each site was documented from forest structure and fire scars in the field using an existing protocol [52]. (PDF) [file pone.0106971.s004.pdf]

**Table S2. List of plot-level sites.** The fire severity classification for each site was documented from forest structure and fire scars in the field using an existing protocol [52].

| <b>Plot Site No.</b> | <b>Fire severity classification</b> | <b>Latitude</b> | <b>Longitude</b> |
|----------------------|-------------------------------------|-----------------|------------------|
| 1                    | mixed                               | 40.6717         | -105.3672        |
| 2                    | mixed                               | 40.6718         | -105.3669        |
| 3                    | low                                 | 40.6702         | -105.3662        |
| 4                    | mixed                               | 39.9343         | -105.3409        |
| 5                    | mixed                               | 39.9354         | -105.3393        |
| 6                    | mixed                               | 40.6277         | -105.3780        |
| 7                    | mixed                               | 40.6635         | -105.3688        |
| 8                    | mixed                               | 40.6635         | -105.3685        |
| 9                    | mixed                               | 40.6616         | -105.3688        |
| 10                   | mixed                               | 40.6571         | -105.3693        |
| 11                   | mixed                               | 40.6557         | -105.3700        |
| 12                   | mixed                               | 40.6559         | -105.3703        |
| 13                   | mixed                               | 40.6569         | -105.3693        |
| 14                   | mixed                               | 40.6548         | -105.3663        |
| 15                   | mixed                               | 40.6365         | -105.4497        |
| 16                   | mixed                               | 40.6376         | -105.4525        |
| 17                   | mixed                               | 40.6378         | -105.4520        |
| 18                   | mixed                               | 40.6363         | -105.4495        |
| 19                   | mixed                               | 40.6362         | -105.4304        |
| 20                   | mixed                               | 40.6370         | -105.4278        |
| 21                   | mixed                               | 40.6368         | -105.4274        |
| 22                   | mixed                               | 40.6348         | -105.4270        |
| 23                   | mixed                               | 40.6301         | -105.4607        |
| 24                   | low                                 | 40.6284         | -105.4614        |
| 25                   | low                                 | 40.6285         | -105.4615        |
| 26                   | mixed                               | 40.6303         | -105.4615        |
| 27                   | mixed                               | 40.4814         | -105.3695        |
| 28                   | mixed                               | 40.4795         | -105.3683        |
| 29                   | mixed                               | 40.4792         | -105.3685        |
| 30                   | low                                 | 40.4800         | -105.3696        |
| 31                   | mixed                               | 40.4586         | -105.3382        |
| 32                   | mixed                               | 40.4575         | -105.3401        |
| 33                   | mixed                               | 40.4577         | -105.3405        |
| 34                   | mixed                               | 40.4590         | -105.3392        |
| 35                   | mixed                               | 40.4005         | -105.4083        |
| 36                   | mixed                               | 40.4011         | -105.4059        |
| 37                   | mixed                               | 40.4015         | -105.4057        |
| 38                   | mixed                               | 40.4019         | -105.4078        |
| 39                   | mixed                               | 40.4017         | -105.4073        |
| 40                   | mixed                               | 40.3921         | -105.4119        |
| 41                   | mixed                               | 40.3924         | -105.4098        |
| 42                   | mixed                               | 40.3926         | -105.4096        |
| 43                   | mixed                               | 40.3928         | -105.4118        |

|    |       |         |           |
|----|-------|---------|-----------|
| 44 | low   | 40.3879 | -105.4101 |
| 45 | mixed | 40.3866 | -105.4117 |
| 46 | mixed | 40.3868 | -105.4121 |
| 47 | mixed | 40.3890 | -105.4120 |
| 48 | low   | 40.3799 | -105.3532 |
| 49 | mixed | 40.3814 | -105.3526 |
| 50 | mixed | 40.3804 | -105.3543 |
| 51 | mixed | 39.8515 | -105.4227 |
| 52 | mixed | 39.8607 | -105.4440 |
| 53 | mixed | 39.7833 | -105.4218 |
| 54 | mixed | 39.8467 | -105.4456 |
| 55 | mixed | 39.8386 | -105.4270 |
| 56 | mixed | 39.8588 | -105.3888 |
| 57 | mixed | 39.8555 | -105.4099 |
| 58 | mixed | 39.8387 | -105.4067 |
| 59 | mixed | 39.8580 | -105.3734 |
| 60 | mixed | 39.8592 | -105.3610 |
| 61 | mixed | 39.8494 | -105.3615 |
| 62 | mixed | 39.8470 | -105.3798 |
| 63 | mixed | 39.8967 | -105.2707 |
| 64 | mixed | 39.8945 | -105.2725 |
| 65 | mixed | 39.7788 | -105.2563 |
| 66 | mixed | 39.7703 | -105.2557 |
| 67 | mixed | 39.6323 | -105.2380 |
| 68 | mixed | 39.6431 | -105.2117 |
| 69 | mixed | 39.6363 | -105.2184 |
| 70 | mixed | 39.6381 | -105.2225 |
| 71 | mixed | 39.6290 | -105.2243 |
| 72 | mixed | 39.7485 | -105.3243 |
| 73 | mixed | 39.7571 | -105.3273 |
| 74 | mixed | 39.7609 | -105.3320 |
| 75 | mixed | 39.7622 | -105.3475 |
| 76 | mixed | 39.7577 | -105.3598 |
| 77 | mixed | 39.7428 | -105.3636 |
| 78 | mixed | 39.7475 | -105.3502 |
| 79 | mixed | 39.7468 | -105.3538 |
| 80 | mixed | 39.6310 | -105.3593 |
| 81 | mixed | 39.6207 | -105.3487 |
| 82 | mixed | 39.6101 | -105.3478 |
| 83 | mixed | 39.6097 | -105.3605 |
| 84 | mixed | 39.6640 | -105.3659 |
| 85 | mixed | 39.6638 | -105.3743 |
| 86 | mixed | 39.6752 | -105.3782 |
| 87 | mixed | 39.6759 | -105.3727 |
| 88 | mixed | 39.5326 | -105.1612 |
| 89 | mixed | 39.5291 | -105.1595 |
| 90 | mixed | 39.5243 | -105.1553 |
| 91 | mixed | 39.5237 | -105.1573 |

|     |       |         |           |
|-----|-------|---------|-----------|
| 92  | mixed | 39.5357 | -105.1819 |
| 93  | mixed | 39.5329 | -105.1842 |
| 94  | mixed | 39.7352 | -105.2484 |
| 95  | mixed | 39.7341 | -105.2402 |
| 96  | mixed | 39.8128 | -105.2843 |
| 97  | mixed | 39.8111 | -105.2931 |
| 98  | low   | 39.8199 | -105.2801 |
| 99  | mixed | 39.8166 | -105.2722 |
| 100 | mixed | 39.8281 | -105.2922 |
| 101 | low   | 39.8266 | -105.2784 |
| 102 | mixed | 39.3489 | -105.3878 |
| 103 | mixed | 39.3486 | -105.3468 |
| 104 | mixed | 39.3680 | -105.3577 |
| 105 | mixed | 39.3379 | -105.2735 |
| 106 | mixed | 39.3399 | -105.2470 |
| 107 | mixed | 39.3348 | -105.3283 |
| 108 | mixed | 39.3940 | -105.1721 |
| 109 | mixed | 39.3397 | -105.1670 |
| 110 | mixed | 39.3307 | -105.1328 |
| 111 | mixed | 39.3309 | -105.0896 |
| 112 | mixed | 39.8814 | -105.3006 |

---
